# Supplementary material for: Fundamental data for modeling electron-induced processes in plasma remediation of perfluoroalkyl substances
Source: Royal Society of Chemistry journal article supplement (doi:10.1039/d4cp01911c), 2024-01-01
Supplement: d4cp01911c1.pdf [file d4cp01911c1.pdf]

**Supporting Information**  
**Electron scattering data and potential**  
**energy landscapes for plasma modelling of**  
**perfluoroalkyl substances**

Marin Sapunar, Mackenzie Meyer, Harindranath B. Ambalampitiya,  
Mark J. Kushner and Zdeněk Mašín

| PFBA            |                             |                         |                         |                                   |                           |                           |
|-----------------|-----------------------------|-------------------------|-------------------------|-----------------------------------|---------------------------|---------------------------|
|                 | ADC(2)<br>d-aug-cc-<br>pVTZ | CCSD<br>aug-cc-<br>pVDZ | B3LYP<br>def2-<br>TZVPD | $\omega$ B97X-D<br>def2-<br>TZVPD | CASSCF<br>aug-cc-<br>pVDZ | CASPT2<br>aug-cc-<br>pVDZ |
| S <sub>1</sub>  | 5.33                        | 5.62                    | 5.41                    | 5.51                              | 5.50                      | 5.51                      |
| S <sub>2</sub>  | 7.57                        | 7.96                    | 7.43                    | 8.04                              | 7.55                      | 7.86                      |
| S <sub>3</sub>  | 8.02                        | 8.54                    | 7.62                    | 8.21                              | 8.89                      | 9.90                      |
| S <sub>4</sub>  | 8.49                        | 8.86                    | 8.18                    | 8.69                              | x                         | x                         |
| S <sub>5</sub>  | 8.81                        | 8.96                    | 8.42                    | 9.00                              | 7.96                      | 9.20                      |
| S <sub>6</sub>  | 8.82                        | 9.48                    | 8.50                    | 9.18                              | 9.49                      | 8.71                      |
| S <sub>7</sub>  | 9.04                        | 9.81                    | 8.58                    | 9.25                              | 9.73                      | 10.13                     |
| S <sub>8</sub>  | 9.29                        | 10.05                   | 8.71                    | 9.71                              |                           |                           |
| S <sub>9</sub>  | 9.49                        | 10.17                   | 8.92                    | 9.88                              |                           |                           |
| S <sub>10</sub> | 9.65                        | 10.34                   | 9.18                    | 10.01                             |                           |                           |

| PFBS            |                             |                         |                         |                                   |                           |
|-----------------|-----------------------------|-------------------------|-------------------------|-----------------------------------|---------------------------|
|                 | ADC(2)<br>d-aug-cc-<br>pVTZ | CCSD<br>aug-cc-<br>pVDZ | B3LYP<br>def2-<br>TZVPD | $\omega$ B97X-D<br>def2-<br>TZVPD | CASSCF<br>aug-cc-<br>pVDZ |
| S <sub>1</sub>  | 7.74                        | 8.22                    | 7.53                    | 8.08                              | 8.33                      |
| S <sub>2</sub>  | 7.90                        | 8.39                    | 7.64                    | 8.22                              | 8.74                      |
| S <sub>3</sub>  | 8.09                        | 8.62                    | 7.94                    | 8.43                              | 9.07                      |
| S <sub>4</sub>  | 8.29                        | 8.78                    | 8.07                    | 8.65                              | 9.22                      |
| S <sub>5</sub>  | 8.44                        | 8.90                    | 8.15                    | 8.67                              | 9.59                      |
| S <sub>6</sub>  | 8.50                        | 9.00                    | 8.33                    | 8.73                              | 10.13                     |
| S <sub>7</sub>  | 8.71                        | 9.09                    | 8.35                    | 8.95                              | 10.24                     |
| S <sub>8</sub>  | 8.74                        | 9.31                    | 8.42                    | 9.03                              |                           |
| S <sub>9</sub>  | 8.87                        | -                       | 8.51                    | 9.17                              |                           |
| S <sub>10</sub> | 9.02                        | -                       | 8.66                    | 9.32                              |                           |

Table S1: Additional electronic structure results for PFBA and PFBS.

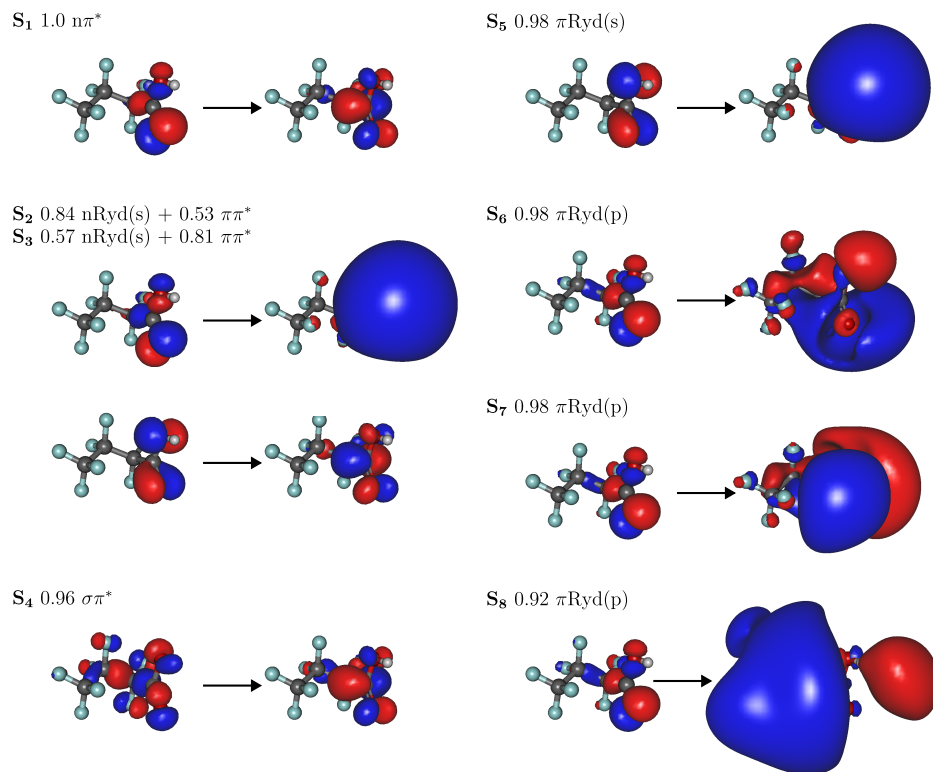

Figure S1: Dominant natural transition orbitals for the 8 lowest singlet excited states of PFBA calculated at the ADC(2)/aug-cc-pVDZ level. In the case of  $S_2$  and  $S_3$  the NTOs for the two states are almost identical due to the two states being a mixture of the same two dominant contributions so only the NTOs of  $S_2$  are shown. Rydberg-like orbitals are shown with an isovalue 0.02, while other orbitals are shown with an isovalue of 0.05.

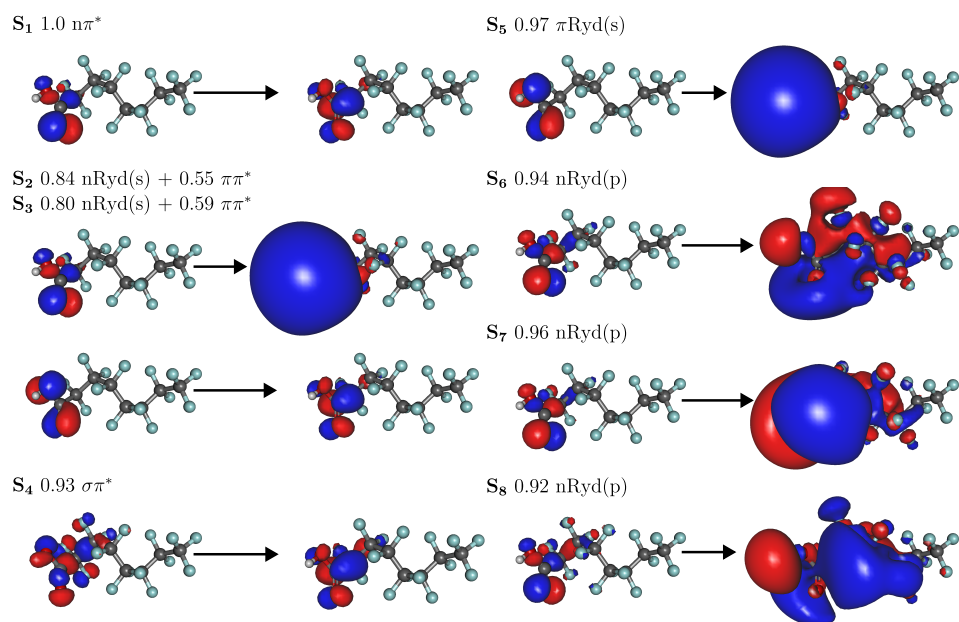

Figure S2: Dominant natural transition orbitals for the 8 lowest singlet excited states of PFOA calculated at the ADC(2)/aug-cc-pVDZ level. In the case of S<sub>2</sub> and S<sub>3</sub> the NTOs for the two states are almost identical due to the two states being a mixture of the same two dominant contributions so only the NTOs of S<sub>2</sub> are shown. Rydberg-like orbitals are shown with an isovalue 0.015, while other orbitals are shown with an isovalue of 0.05.



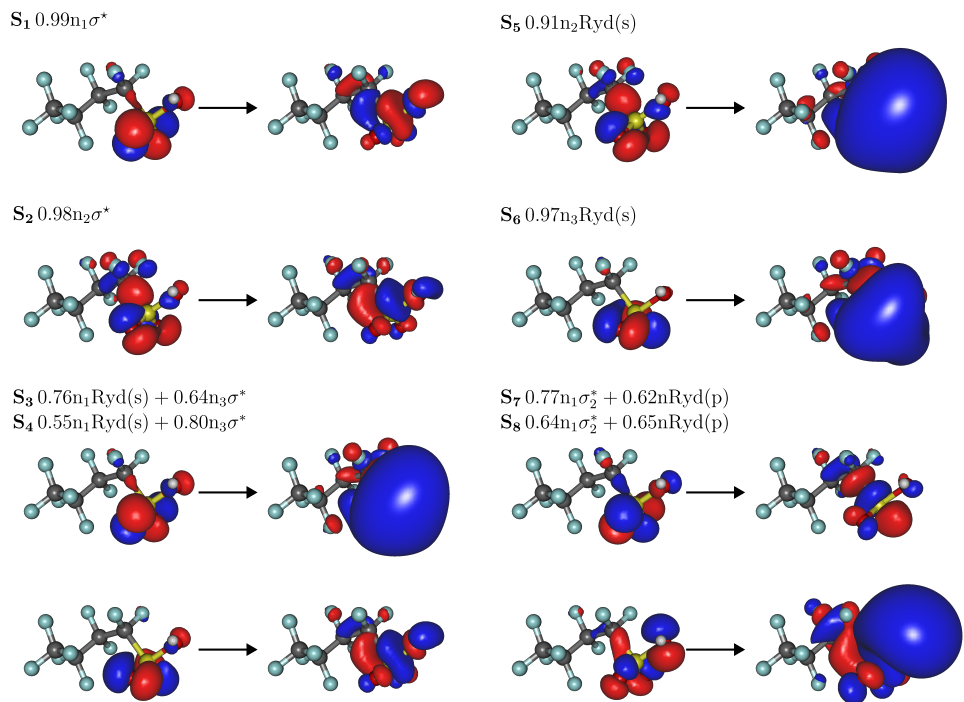

Figure S3: Dominant natural transition orbitals for the 8 lowest singlet excited states of PFBS calculated at the ADC(2)/aug-cc-pVDZ level. In the case of  $S_3/S_4$  and  $S_7/S_8$  the NTOs for the two states are almost identical due to the two states being a mixture of the same two dominant contributions so only the NTOs of  $S_3$  and  $S_7$  are shown. Rydberg-like orbitals are shown with an isovalue 0.02, while other orbitals are shown with an isovalue of 0.05.

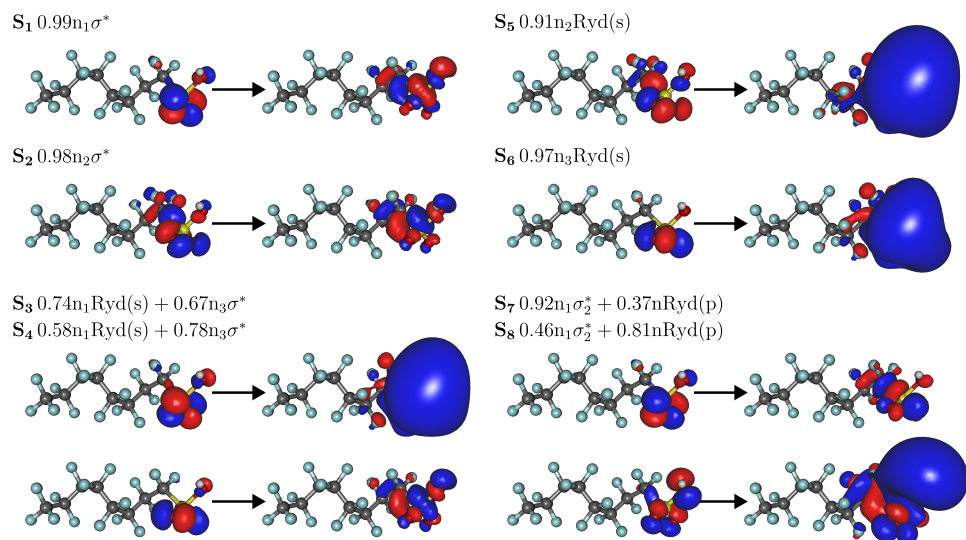

Figure S4: Dominant natural transition orbitals for the 8 lowest singlet excited states of PFOS calculated at the ADC(2)/aug-cc-pVDZ level. In the case of  $S_3/S_4$  and  $S_7/S_8$  the NTOs for the two states are almost identical due to the two states being a mixture of the same two dominant contributions so only the NTOs of  $S_3$  and  $S_7$  are shown. Rydberg-like orbitals are shown with an isovalue 0.015, while other orbitals are shown with an isovalue of 0.05.

| PFBA           |                                  | PFBS           |                                                                     |
|----------------|----------------------------------|----------------|---------------------------------------------------------------------|
| State          | Transition                       | State          | Transition                                                          |
| S <sub>1</sub> | 0.98 n $\pi^*$                   | S <sub>1</sub> | 0.81 n <sub>2</sub> $\sigma_1^*$                                    |
| S <sub>2</sub> | 0.66 $\pi_1\pi^*$ + 0.56 nRyd(s) | S <sub>2</sub> | 0.54 n <sub>3</sub> Ryd + 0.52 n <sub>2</sub> Ryd                   |
| S <sub>3</sub> | 0.92 $\pi_1$ Ryd(s)              | S <sub>3</sub> | 0.52 n <sub>1</sub> $\sigma_1^*$ + 0.45 n <sub>1</sub> Ryd          |
| S <sub>4</sub> | 0.60 $\pi_1\pi^*$ + 0.72 nRyd(s) | S <sub>4</sub> | 0.68 n <sub>2</sub> $\sigma_2^*$ + 0.35 n <sub>1</sub> $\sigma_1^*$ |
| S <sub>5</sub> | 0.98 $\sigma\pi^*$               | S <sub>5</sub> | 0.89 n <sub>1</sub> $\sigma_2^*$                                    |
| S <sub>6</sub> | 0.82 $\pi_2$ Ryd(s)              | S <sub>6</sub> | 0.57 n <sub>2</sub> $\sigma_1^*$ + 0.48 n <sub>1</sub> Ryd          |
| S <sub>7</sub> | 0.87 $\pi_2\pi^*$                | S <sub>7</sub> | 0.60 n <sub>3</sub> $\sigma_1^*$ + 0.32 n <sub>1</sub> $\sigma_1^*$ |

Table S2: Dominant transitions for the seven lowest excited singlet states of PFBA and PFBS at the CASSCF/cc-pVDZ level. The active space orbitals are shown in Fig. S5.

#### PFBA / CAS(8,8)

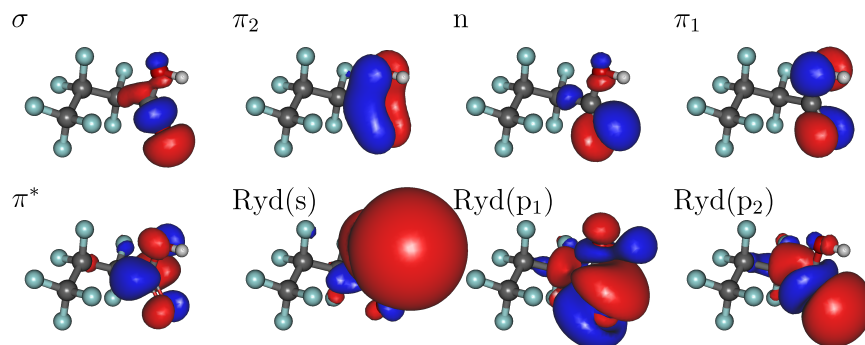

#### PFBS / CAS(10,8)

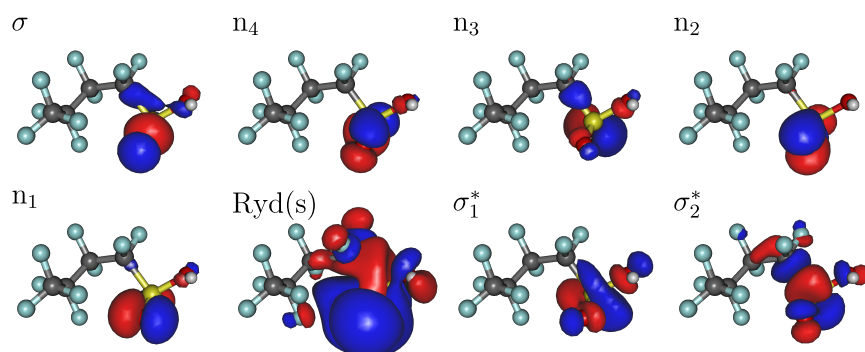

Figure S5: Active space orbitals of PFBA and PFBS at the CASSCF/cc-pVDZ level. Rydberg-like orbitals are shown with an isovalue 0.015, while other orbitals are shown with an isovalue of 0.05.

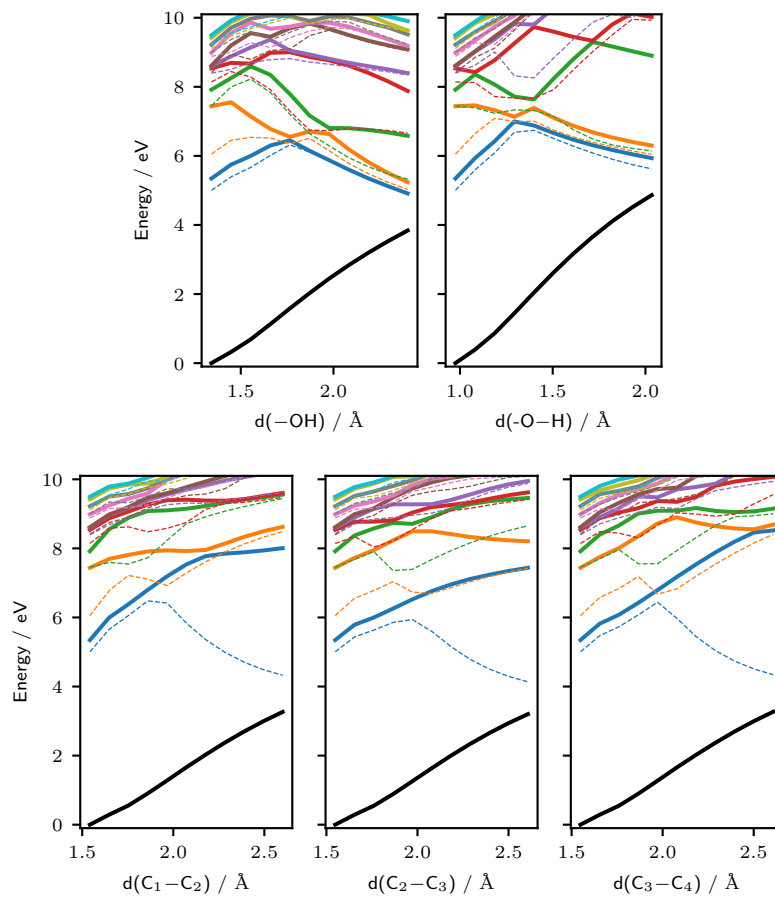

Figure S6: Scan of the PES of PFOA along the H, OH,  $C_1-C_2$ ,  $C_2-C_3$  and  $C_3-C_4$  dissociation coordinates at the RI-ADC(2)/aug-cc-pVDZ level relaxed on the  $S_0$  surface. The ten lowest singlet (full lines) and triplet (dashed lines) excited states are shown.

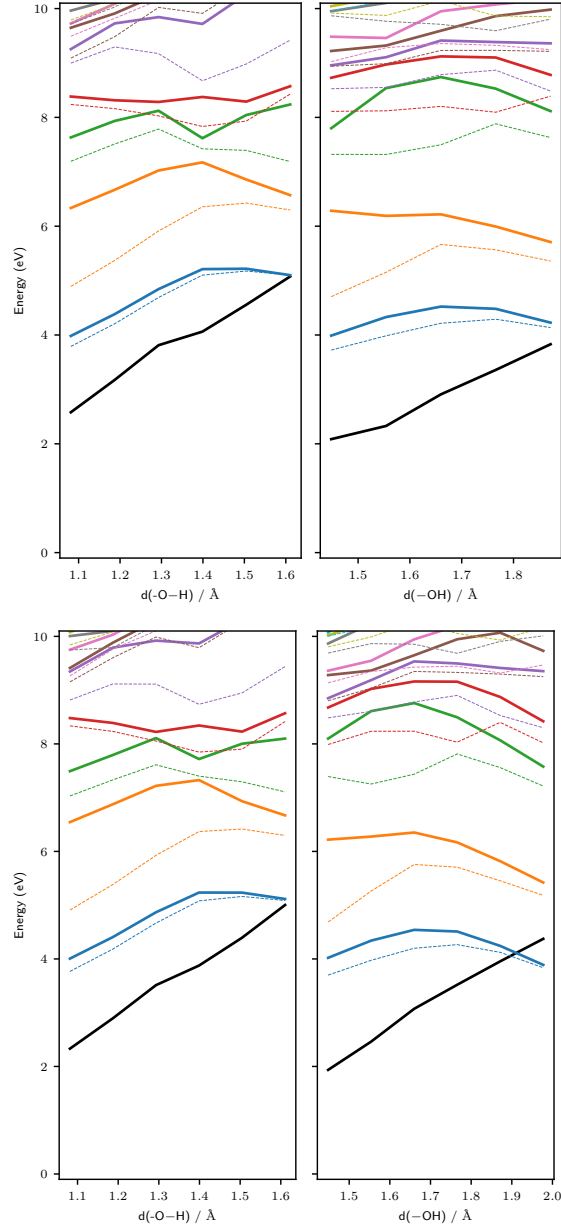

Figure S7: Scan of the PES of PFBA along the OH and H dissociation coordinates at the RI-ADC(2)/aug-cc-pVDZ level relaxed on the  $S_1$  (upper panels) and  $T_1$  (lower panels) surfaces. The ten lowest singlet (full lines) and triplet (dashed lines) excited states are shown.

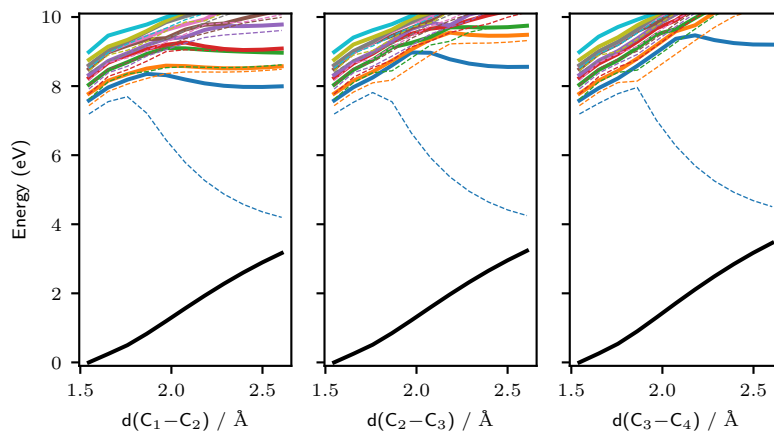

Figure S8: Scan of the PES of PFBS along the  $C_1-C_2$ ,  $C_2-C_3$  and  $C_3-C_4$  dissociation coordinates at the RI-ADC(2)/aug-cc-pVDZ level relaxed on the  $S_0$  surface. The ten lowest singlet (full lines) and triplet (dashed lines) excited states are shown.

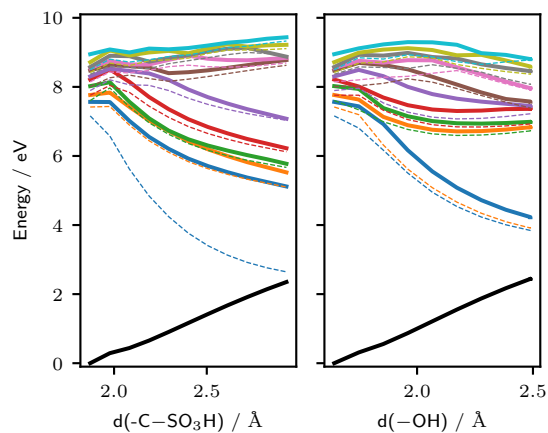

Figure S9: Scan of the PES of PFOS along the sulfo and OH dissociation coordinates at the RI-ADC(2)/aug-cc-pVDZ level relaxed on the  $S_0$  surface. The ten lowest singlet (full lines) and triplet (dashed lines) excited states are shown.

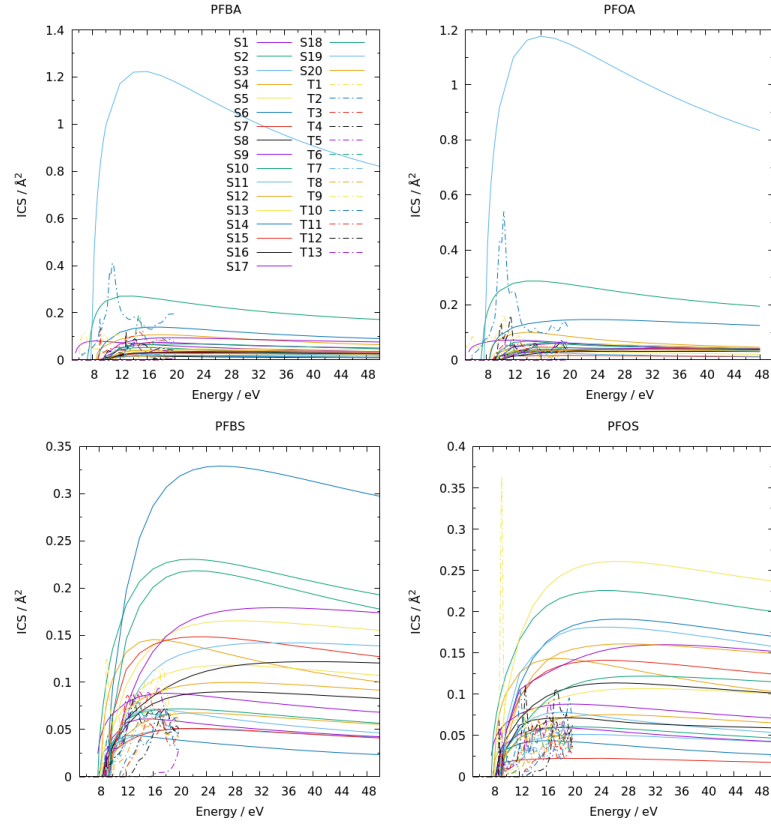

Figure S10: Recommended cross sections for impact excitation of singlet and triplet states of PFBA, PFOA, PFBS and PFOS calculated using the Born approximation and the R-matrix approach.

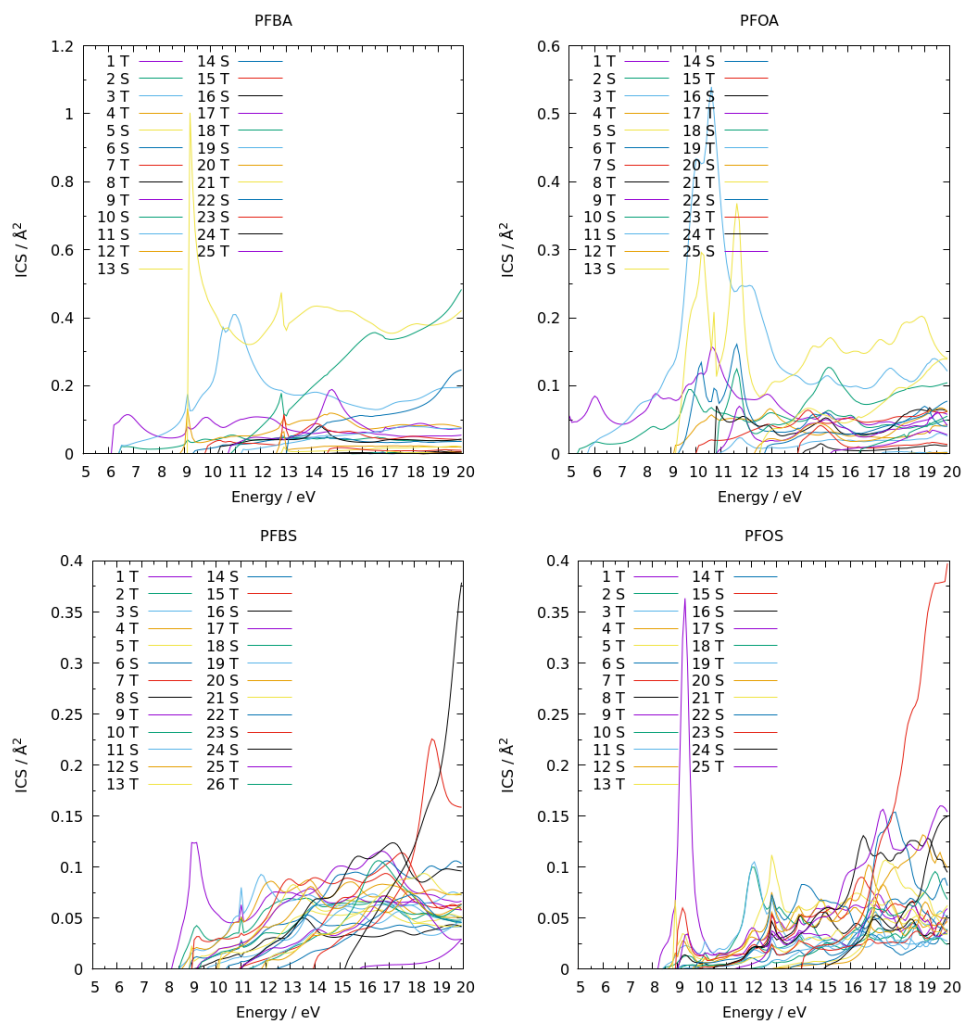

Figure S11: Complete set of R-matrix CAS inelastic cross sections for PFBA, PFOA (top row), PFBS, PFOS (bottom row) calculated on the CAS level.
